# Supplementary material for: Nanotopography regulates motor neuron differentiation of human pluripotent stem cells
Source: Royal Society of Chemistry journal article supplement (doi:10.1039/c7nr05430k), 2018-01-01
Supplement: c7nr05430k1.pdf [file c7nr05430k1.pdf]

## SUPPLEMENTARY INFORMATION

### **Nanotopography Regulates Motor Neuron Differentiation of Human Pluripotent Stem Cells**

Weiqliang Chen,<sup>\*a,b</sup> Shuo Han,<sup>a</sup> Weyi Qian,<sup>b</sup> Shinuo Weng,<sup>a</sup> Haiou Yang,<sup>a,c</sup> Yubing Sun,<sup>a</sup>  
Luis G. Villa-Diaz,<sup>d</sup> Paul H. Krebsbach,<sup>e</sup> and Jianping Fu<sup>\*a,f,g</sup>

<sup>a</sup>Department of Mechanical Engineering, University of Michigan, Ann Arbor, MI 48105, USA;  
<sup>b</sup>Department of Mechanical and Aerospace Engineering, New York University, New York, NY  
10012, USA; <sup>c</sup>Shanghai Children's Medical Center, Shanghai Jiao Tong University, Shanghai,  
200062, China; <sup>d</sup>Department of Biological Sciences, Oakland University, Rochester, MI 48105,  
USA; <sup>e</sup>School of Dentistry, University of California Los Angeles, Los Angeles, CA 90095, USA;  
<sup>f</sup>Department of Biomedical Engineering, University of Michigan, Ann Arbor, MI 48105, USA;  
<sup>g</sup>Department of Cell and Developmental Biology, University of Michigan Medical School, Ann  
Arbor, MI 48109, USA.

\*Correspondence should be addressed to W. Chen (email: [wchen@nyu.edu](mailto:wchen@nyu.edu)) or J. Fu (email:  
[jpfu@umich.edu](mailto:jpfu@umich.edu)).

## Supplementary Figures 1 to 12

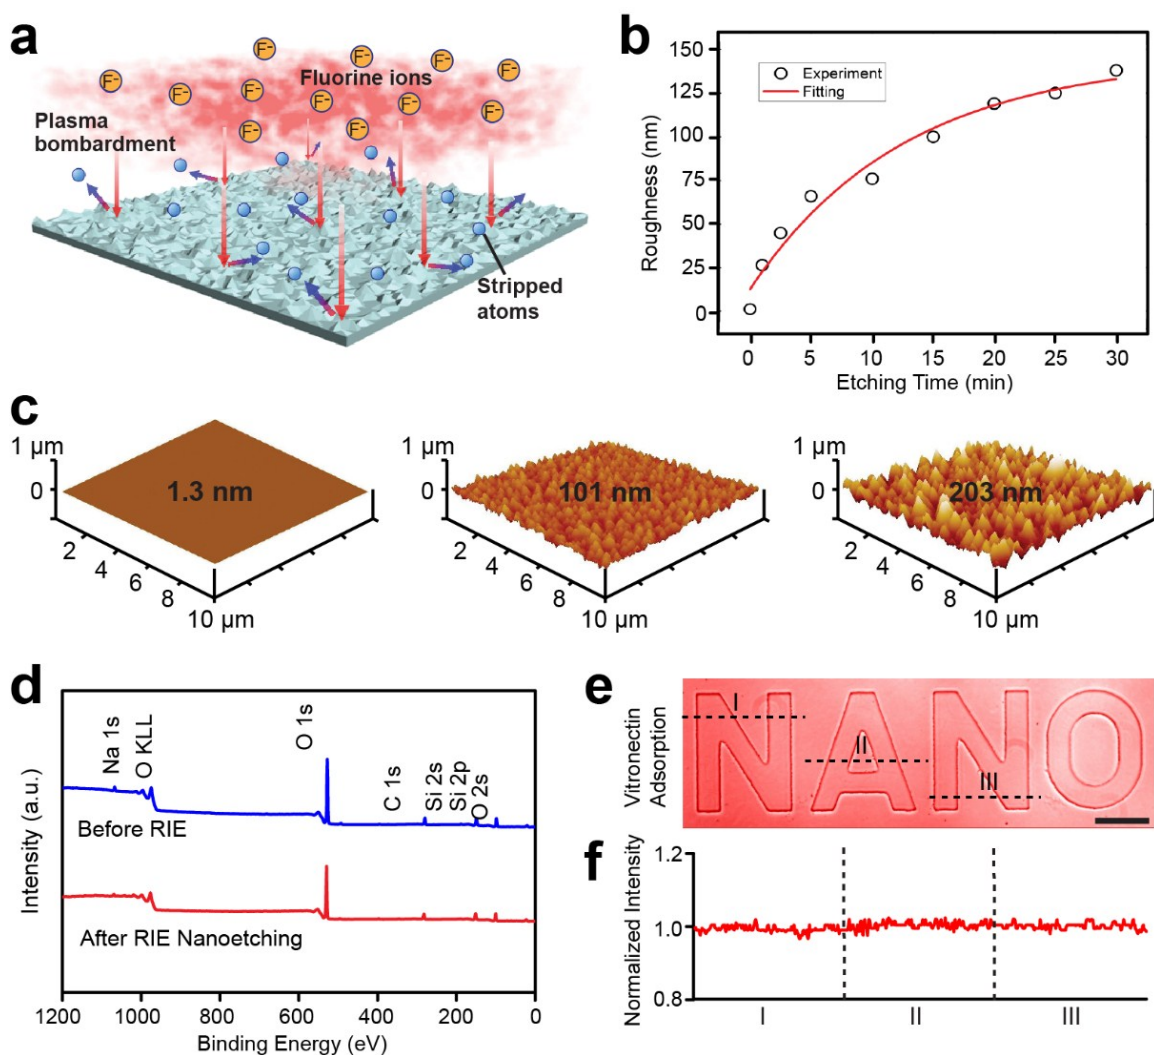

**Fig. S1.** Characterization of nanoengineered nanotopographic surfaces. **(a)** Schematic of nanotopography generated by RIE on glass surfaces. **(b)** Nanoroughness as a function of RIE process time. **(c)** AFM topographs of glass substrates before (*left*;  $R_q = 1.3$  nm) and after (*middle&right*;  $R_q = 101$  nm & 203 nm) RIE processing. **(d)** XPS survey spectra measured for glass substrates before (*blue curve*) and after RIE nanoetching (*red curve*). **(e)** Merged phase-contrast and anti-vitronectin immunofluorescence image of micropatterned glass substrate with vitronectin coating. **(f)** Normalized fluorescence intensity at the dash lines (I-III) in **e**. No significant difference in fluorescence intensity of the adsorbed vitronectin proteins was observed in the unprocessed smooth and RIE-processed nanorough regions.

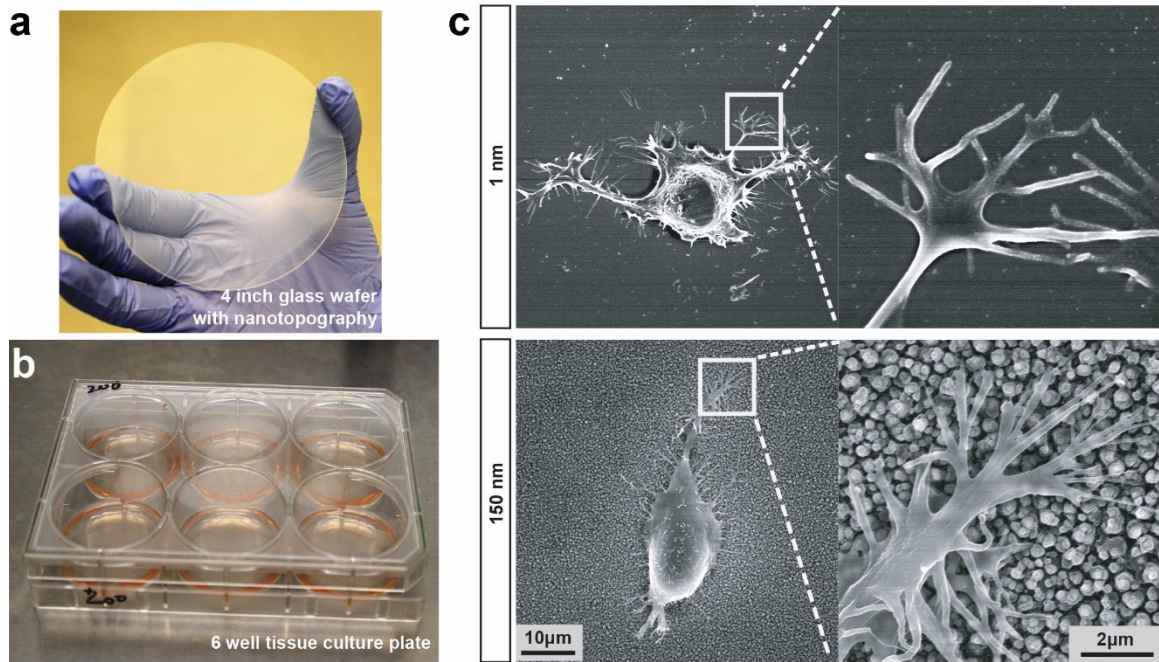

**Fig. S2.** (a&b) Photograph showing a 4-inch glass wafer with nanotopographic features (a) before cut and placed into tissue culture dishes (b). (c) Representative SEM images showing hPSCs plated on smooth ( $R_q = 1$  nm) and nanorough ( $R_q = 150$  nm) glass surfaces.

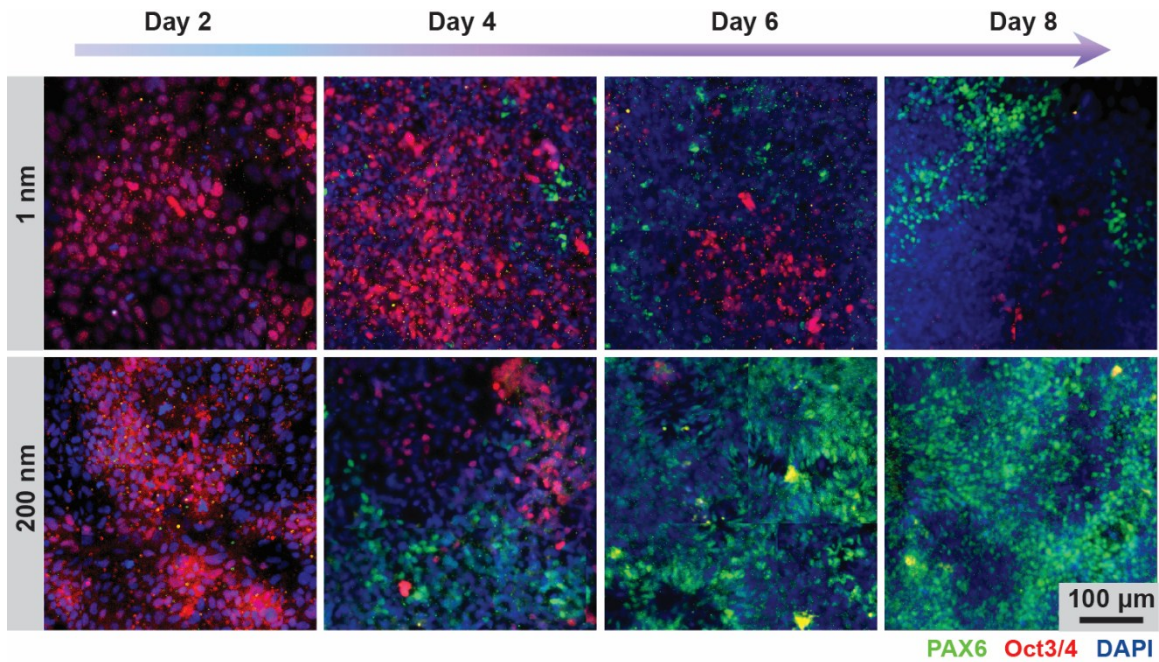

**Fig. S3.** Representative immunofluorescence images showing temporal expression of pluripotency (Oct3/4; red) and neuroectodermal (PAX6; green) markers during neural induction of hPSCs in neural induction medium on smooth (top;  $R_q = 1$  nm) and nanorough (bottom;  $R_q = 200$  nm) glass substrates as indicated.

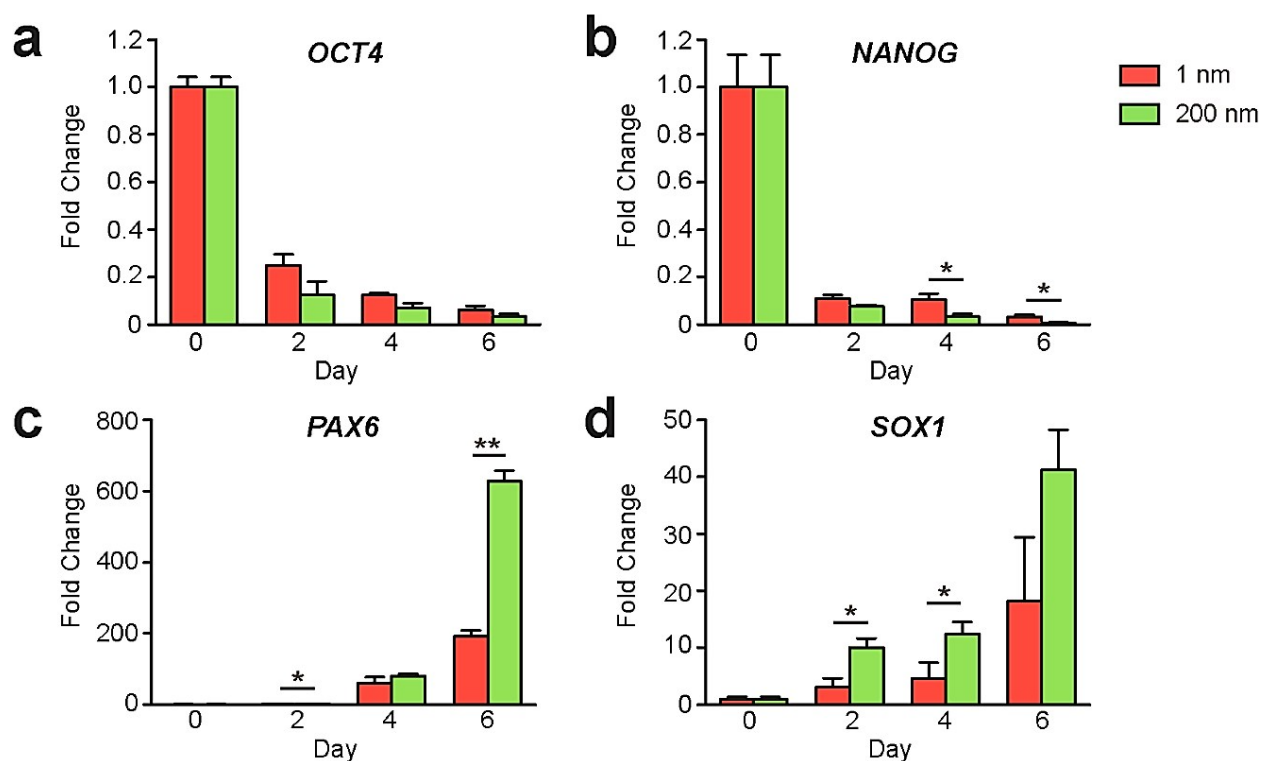

**Fig. S4.** qRT-PCR analysis for temporal expression of pluripotency (*OCT4* and *NANOG*; **a&b**) and neuroectodermal (*PAX6* and *SOX1*; **c&d**) markers during neural induction of hPSCs. hPSCs were cultured in neural induction medium on smooth ( $R_q = 1$  nm) and nanorough ( $R_q = 200$  nm) surfaces. Expression level of *OCT4*, a pluripotency marker, was reduced on both nanorough and smooth glass substrates at day 2. *NANOG*, another gene associated with pluripotency, decreased more significantly at both day 4 and 6 on nanorough ( $R_q = 200$  nm) glass substrates compared with smooth controls ( $R_q = 1$  nm). Genes associated with neural lineages, including *PAX6* and *SOX1*, showed greater levels of expression on nanorough surfaces after day 2 when compared to smooth controls. Expression level of each gene was normalized to data from undifferentiated hPSCs. Data represent the mean  $\pm$  s.e.m with  $n = 3$ .  $P$ -values were calculated using the Student's paired sample  $t$ -test. \*,  $P < 0.05$ ; \*\*,  $P < 0.01$ .

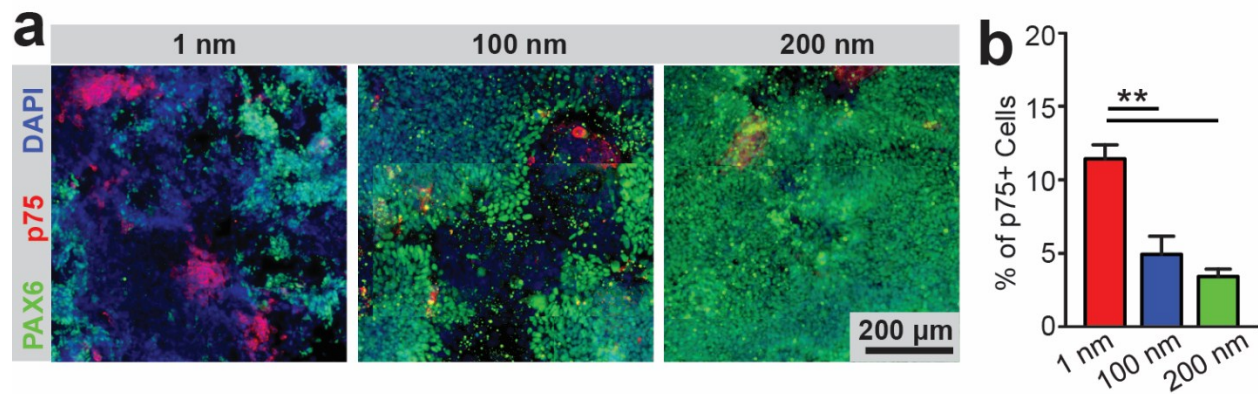

**Fig. S5. (a)** Representative immunofluorescence images showing PAX6+ NEs and p75+ NCs after 8 days of culture on smooth ( $R_q = 1$  nm) and nanorough ( $R_q = 100$  nm & 200 nm) glass surfaces. **(b)** Percentages of p75+ NC cells derived from hPSCs at day 8 as a function of nanoroughness. Data represent the mean  $\pm$  s.e.m. with  $n = 3$ .  $P$ -values were calculated using the Student's paired sample  $t$ -test. \*\*,  $P < 0.01$ .

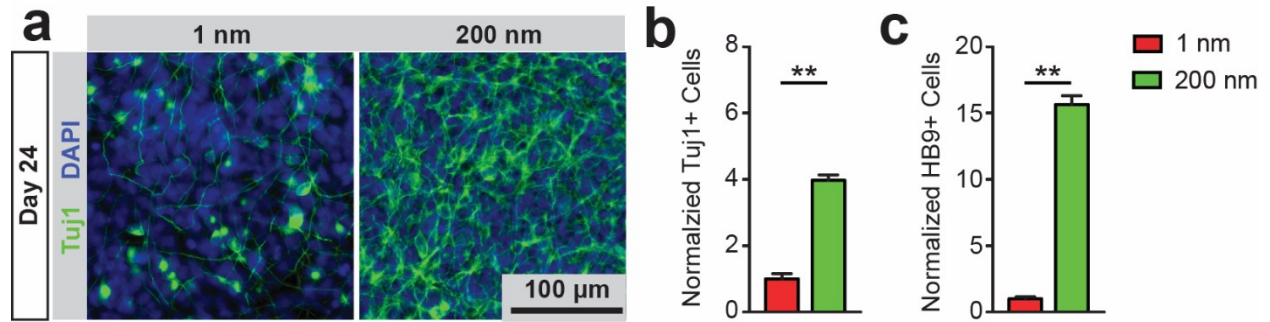

**Fig. S6.** (a) Representative immunofluorescence images showing TuJ1+ cells after 24 days of differentiation in MN differentiation medium on smooth ( $R_q = 1$  nm) and nanorough ( $R_q = 200$  nm) glass substrates. (b-c) Bar plots showing normalized TuJ1+ (b) and HB9+ (c) cell numbers at day 24 as a function of surface nanoroughness as indicated.





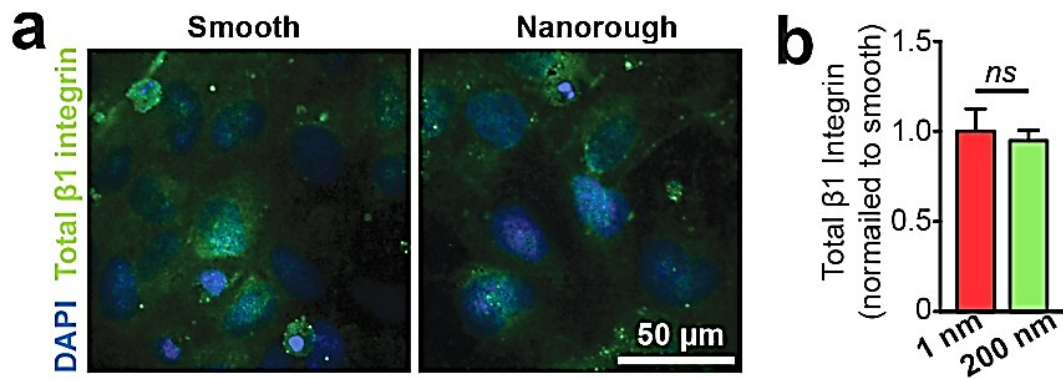

**Fig. S8.** (a) Immunofluorescence images showing total  $\beta 1$  integrin in undifferentiated hPSCs on smooth ( $R_q = 1$  nm) and nanorough ( $R_q = 200$  nm) glass substrates after 48 hr of culture. (b) Bar graphs showing quantitative results of normalized total  $\beta 1$  integrin for Oct3/4+ hPSCs cultured on substrates with different nanoroughness as indicated. Error bars represent  $\pm$  s.e.m. with  $n = 10$ .  $P$ -values were calculated using the Student's paired sample  $t$ -test. *ns*,  $P > 0.05$ .

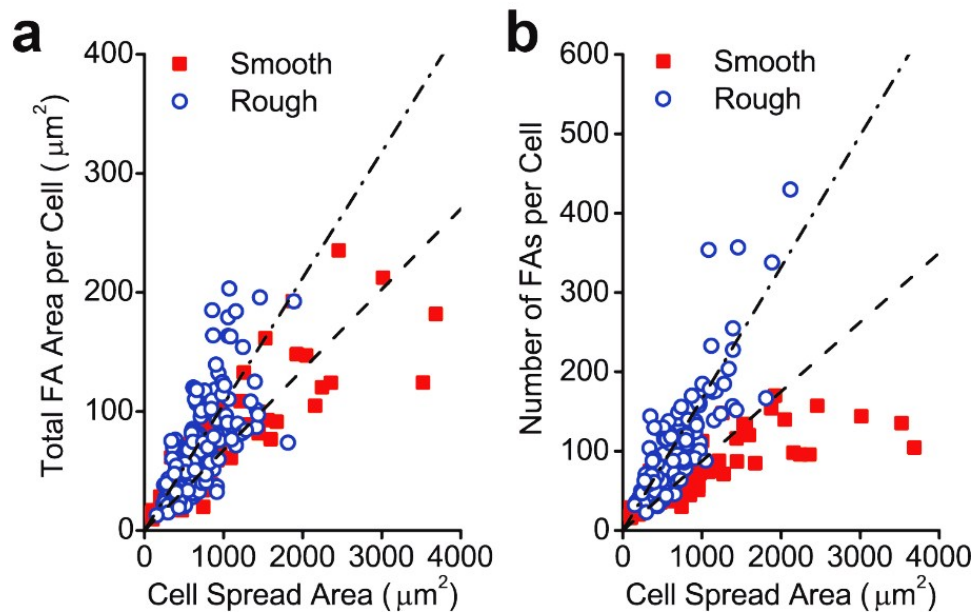

**Fig. S9.** Subcellular analysis of focal adhesion (FA) in hPSCs cultured on smooth ( $R_q = 1$  nm) and nanorough ( $R_q = 200$  nm) glass substrates.

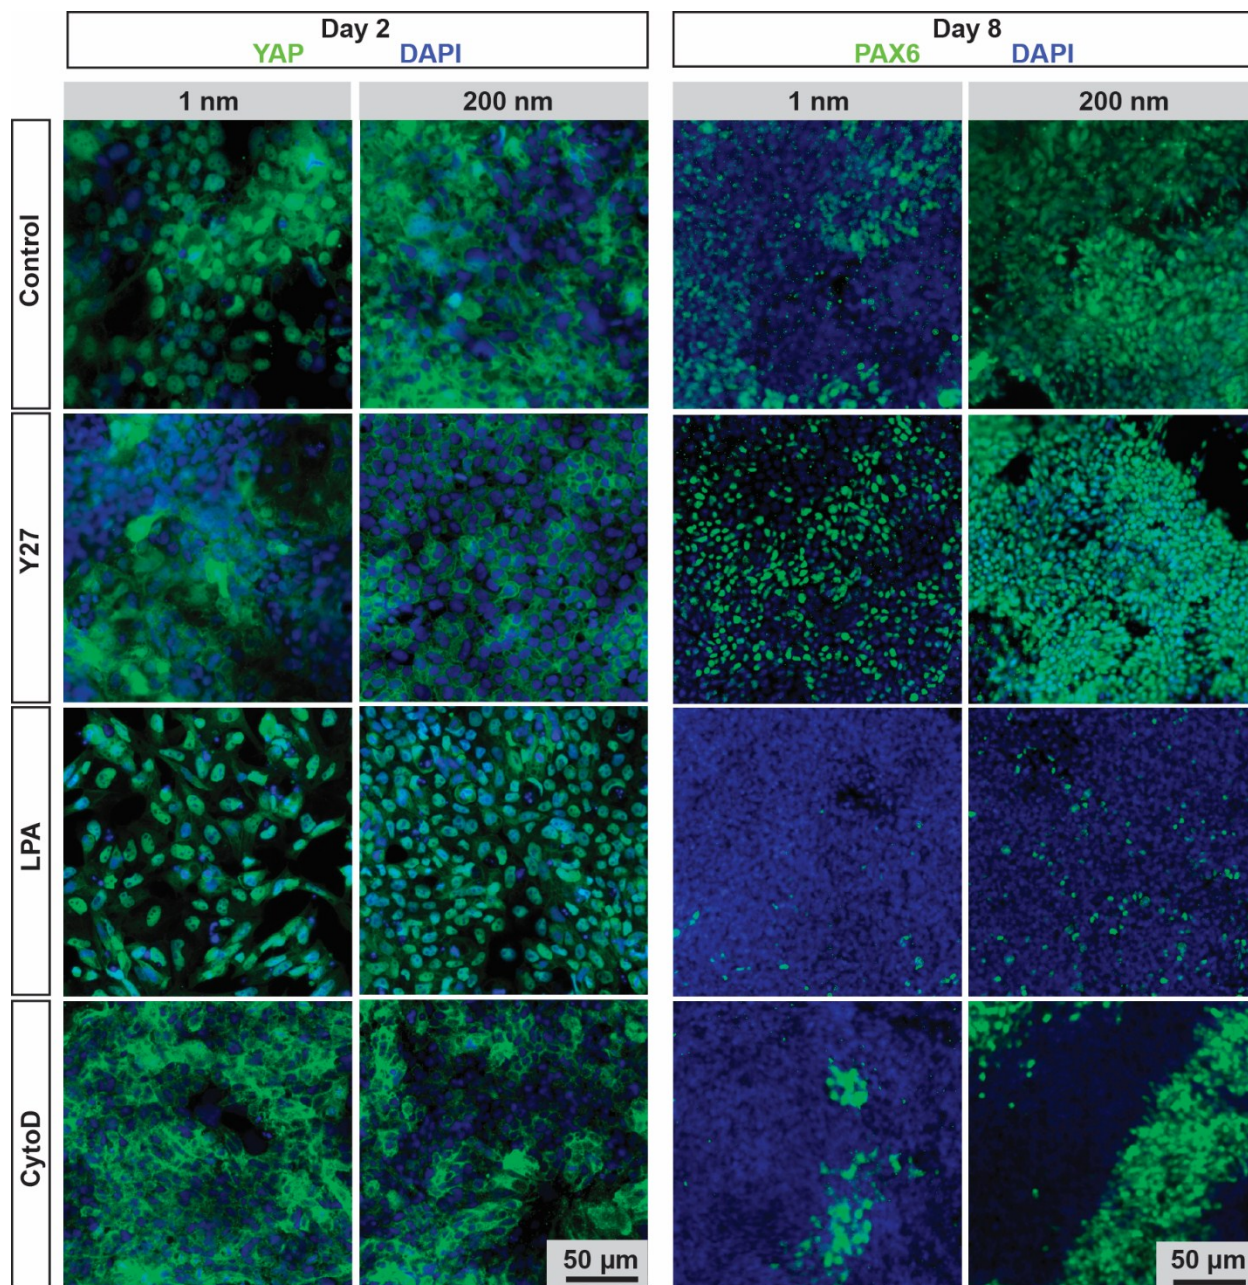

**Fig. S10.** Representative immunofluorescence images showing nanoroughness-dependent subcellular localization of YAP in hPSCs at day 2 and PAX6+ NEs derived from hPSCs at day 8 on smooth ( $R_q = 1$  nm) and nanorough ( $R_q = 200$  nm) glass surfaces under different drug treatments as indicated.

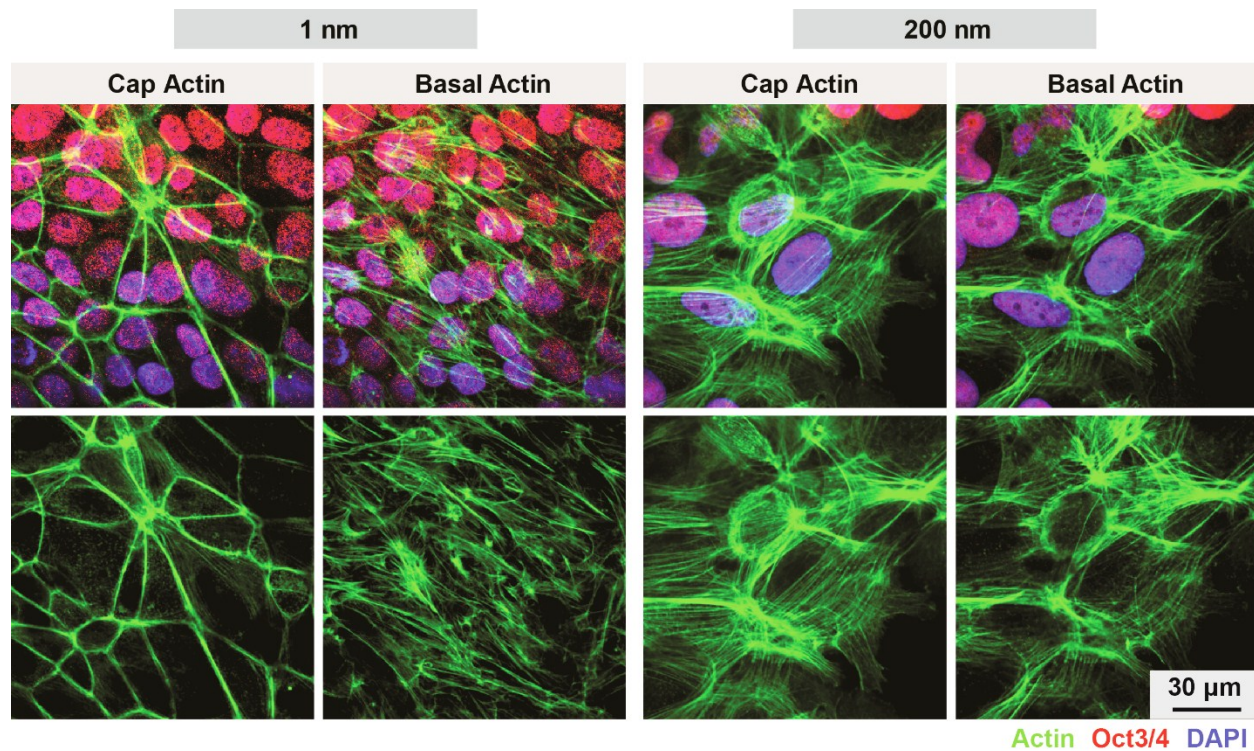

**Fig. S11.** Immunofluorescence images showing actin CSK (green), including cap actin (left panels) and basal actin (right panels) filament organization, in Oct3/4+ hPSCs cultured on smooth ( $R_q = 1$  nm) and nanorough ( $R_q = 200$  nm) glass substrates as indicated. The confocal microscopy sections show the actin filament network at the apical surface (cap actin) and basal surface (basal actin) of Oct3/4+ hPSCs cultured on smooth ( $R_q = 1$  nm) and nanorough ( $R_q = 200$  nm) glass substrates. There are thick, parallel, and highly contractile perinuclear cap actin filament bundles observed in the hPSCs on the nanorough substrates, while well-developed basal stress fibers were found and apical perinuclear actin cap is absent in hPSCs on the smooth substrates.

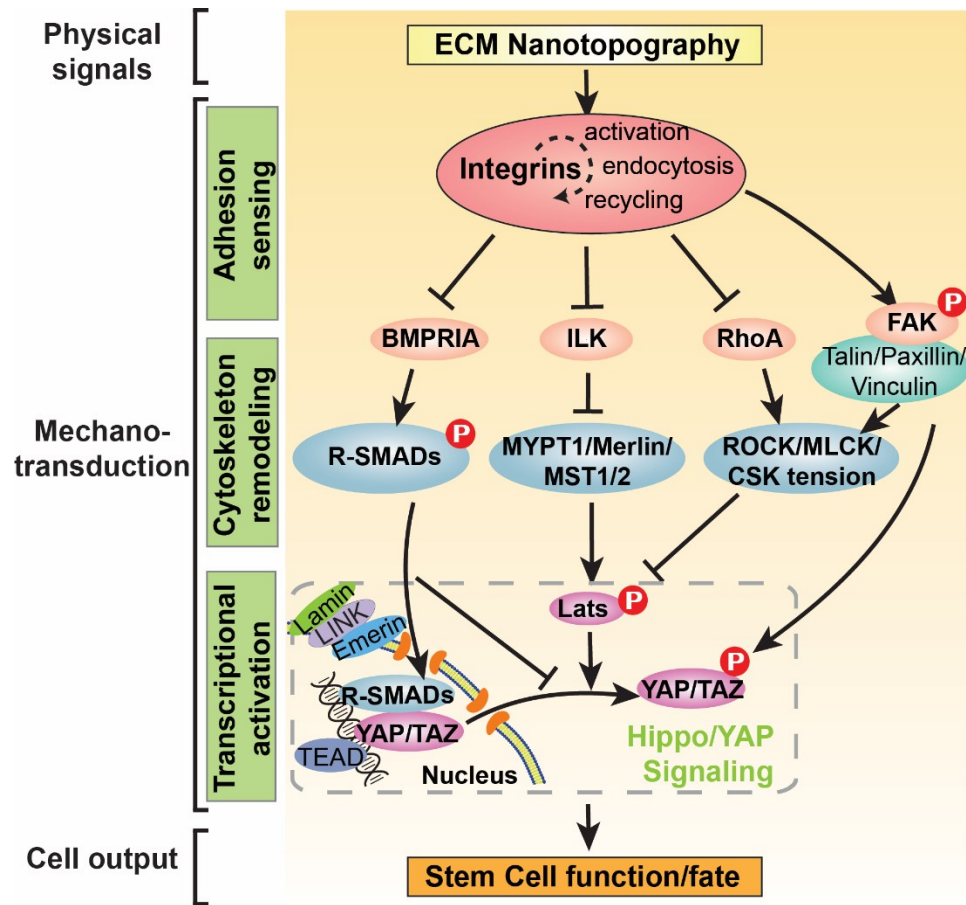

Fig. S12. Nanotopography-triggered signaling controls hPSC behaviors.
